# Supplementary material for: β-Diketone derivatives: influence of the chelating group on the photophysical and mechanofluorochromic properties
Source: Royal Society of Chemistry journal article supplement (doi:10.1039/c8pp00070k), 2018-05-11

---

---

*Supporting Information*

**$\beta$ -Diketone derivatives: influence of the chelating  
group on the photophysical and  
mechanofluorochromic properties**

Marine Louis,<sup>[a]</sup> Régis Guillot,<sup>[b]</sup> Rémi Métivier\*<sup>[a]</sup> and Clémence Allain\*<sup>[a]</sup>

[a] PPSM, ENS Cachan, CNRS, Université Paris-Saclay, 94235 Cachan (France)

[b] ICMMO, Univ Paris-Sud, CNRS, Université Paris-Saclay, 91405 Orsay (France)

\* Corresponding authors: [metivier@ppsm.ens-cachan.fr](mailto:metivier@ppsm.ens-cachan.fr), [clemence.allain@ens-cachan.fr](mailto:clemence.allain@ens-cachan.fr)

**Table S1.** Crystallographic data and structure refinement details.

| <b>Compounds</b>                                               | <b>P-Ester</b>                                 |
|----------------------------------------------------------------|------------------------------------------------|
| Empirical Formula                                              | C <sub>18</sub> H <sub>15</sub> O <sub>5</sub> |
| <i>M<sub>r</sub></i>                                           | 312.31                                         |
| Crystal size, mm <sup>3</sup>                                  | 0.12 x 0.11 x 0.03                             |
| Crystal system                                                 | monoclinic                                     |
| Space group                                                    | <i>C c</i>                                     |
| a, Å                                                           | 34.531(3)                                      |
| b, Å                                                           | 7.3710(7)                                      |
| c, Å                                                           | 11.7082(9)                                     |
| α, °                                                           | 90                                             |
| β, °                                                           | 100.238(9)                                     |
| γ, °                                                           | 90                                             |
| Cell volume, Å <sup>3</sup>                                    | 2932.6(5)                                      |
| Z ; Z'                                                         | 8 ; 2                                          |
| T, K                                                           | 100(1)                                         |
| Radiation type ; wavelength Å                                  | MoKα ; 0.71073                                 |
| F <sub>000</sub>                                               | 1304                                           |
| μ, mm <sup>-1</sup>                                            | 0.104                                          |
| θ range, °                                                     | 2.397 - 23.392                                 |
| Reflection collected                                           | 41 501                                         |
| Reflections unique                                             | 4 252                                          |
| R <sub>int</sub>                                               | 0.0721                                         |
| GOF                                                            | 1.071                                          |
| Refl. obs. ( <i>I</i> >2σ( <i>I</i> ))                         | 3 592                                          |
| Parameters                                                     | 421                                            |
| wR <sub>2</sub> (all data)                                     | 0.1523                                         |
| R value ( <i>I</i> >2σ( <i>I</i> ))                            | 0.0619                                         |
| Largest diff. peak and hole (e <sup>-</sup> .Å <sup>-3</sup> ) | 0.443 ; -0.368                                 |

## NMR spectra

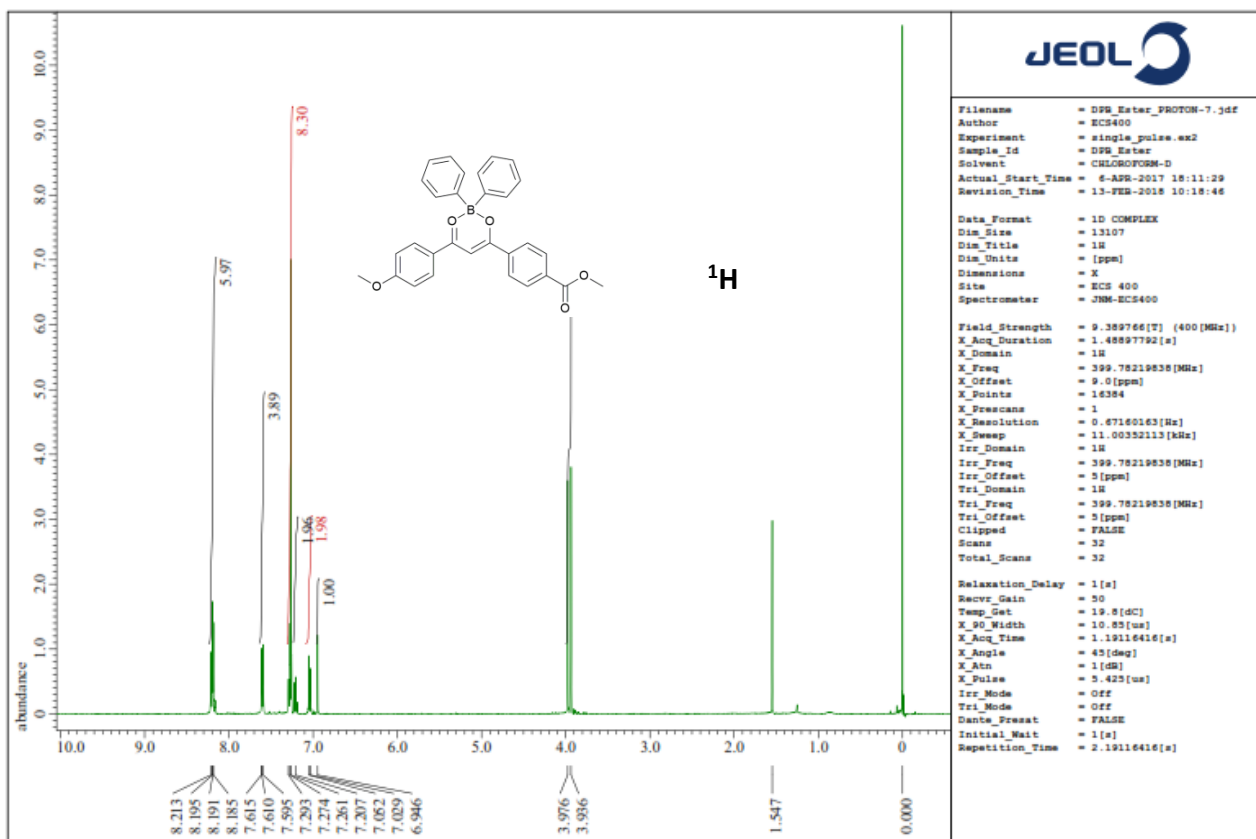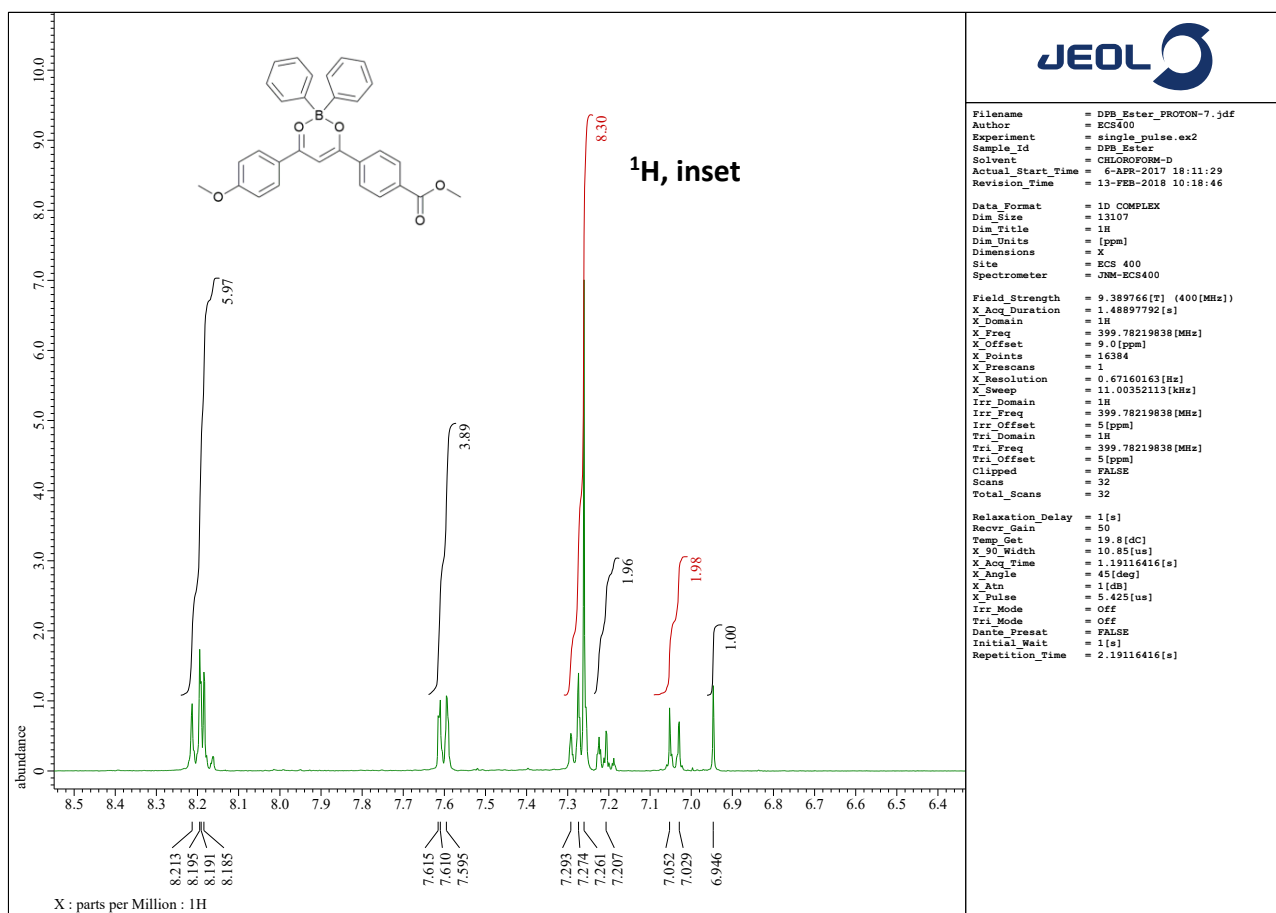

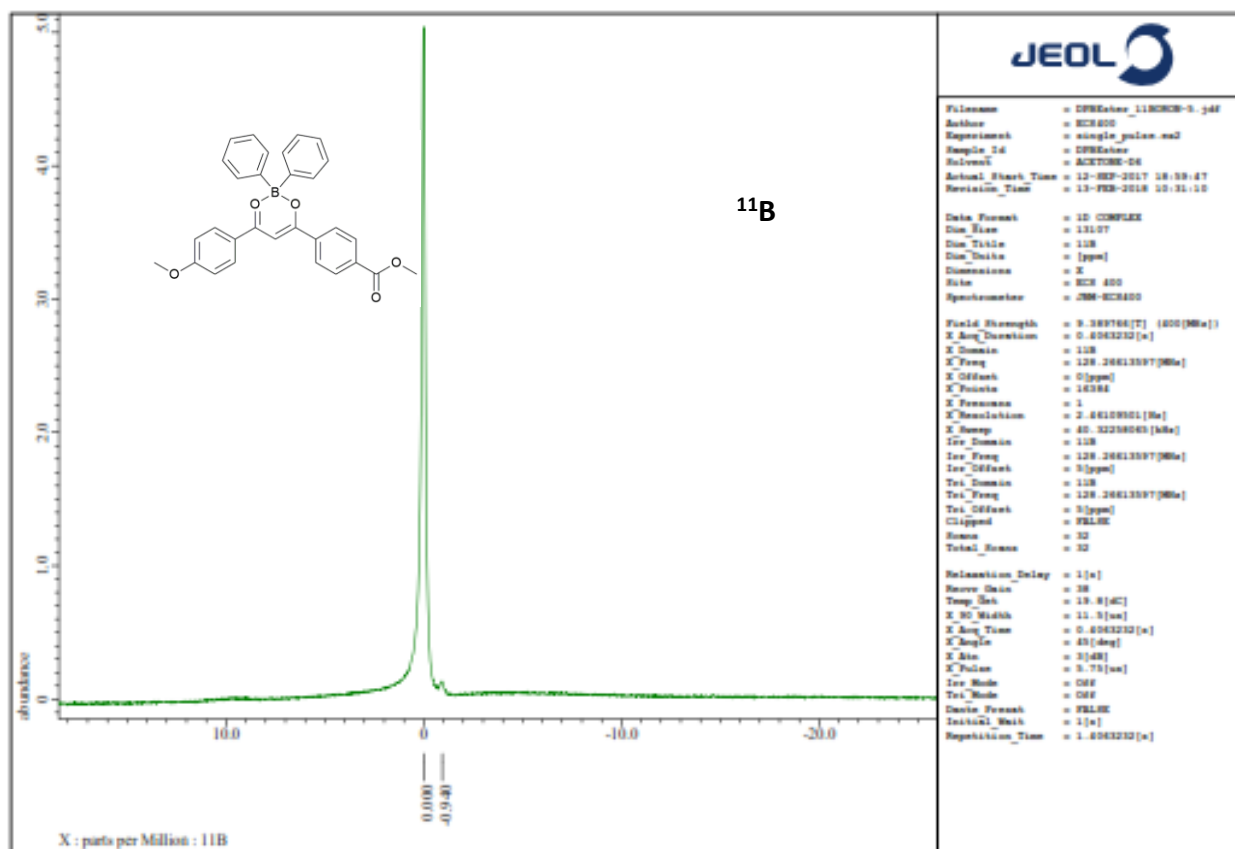

**Differential Scanning Calorimetry and Thermogravimetric Analysis**

Differential scanning calorimetry and thermogravimetric analyses were performed on a Mettler Toledo TGA/DSC Star System, under air at 5 to 10°C / min.

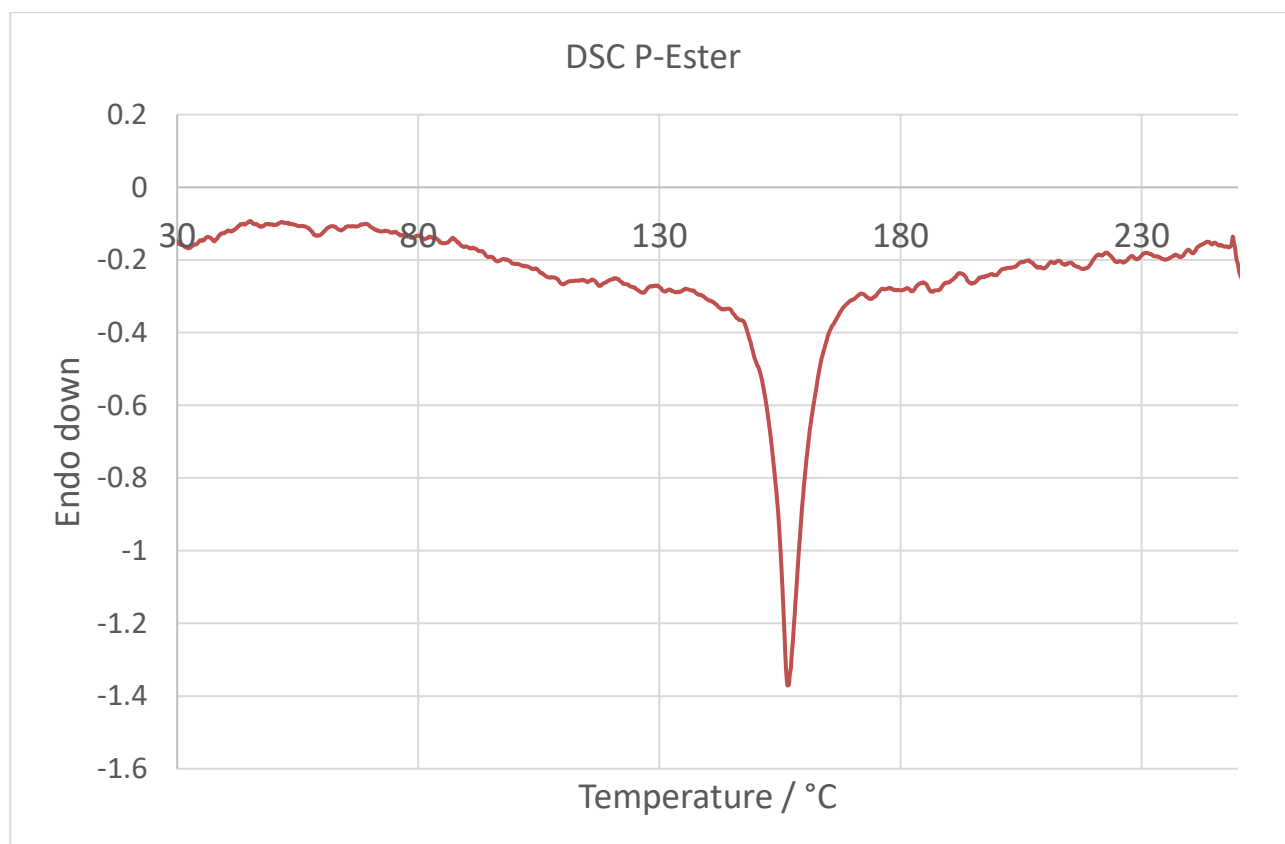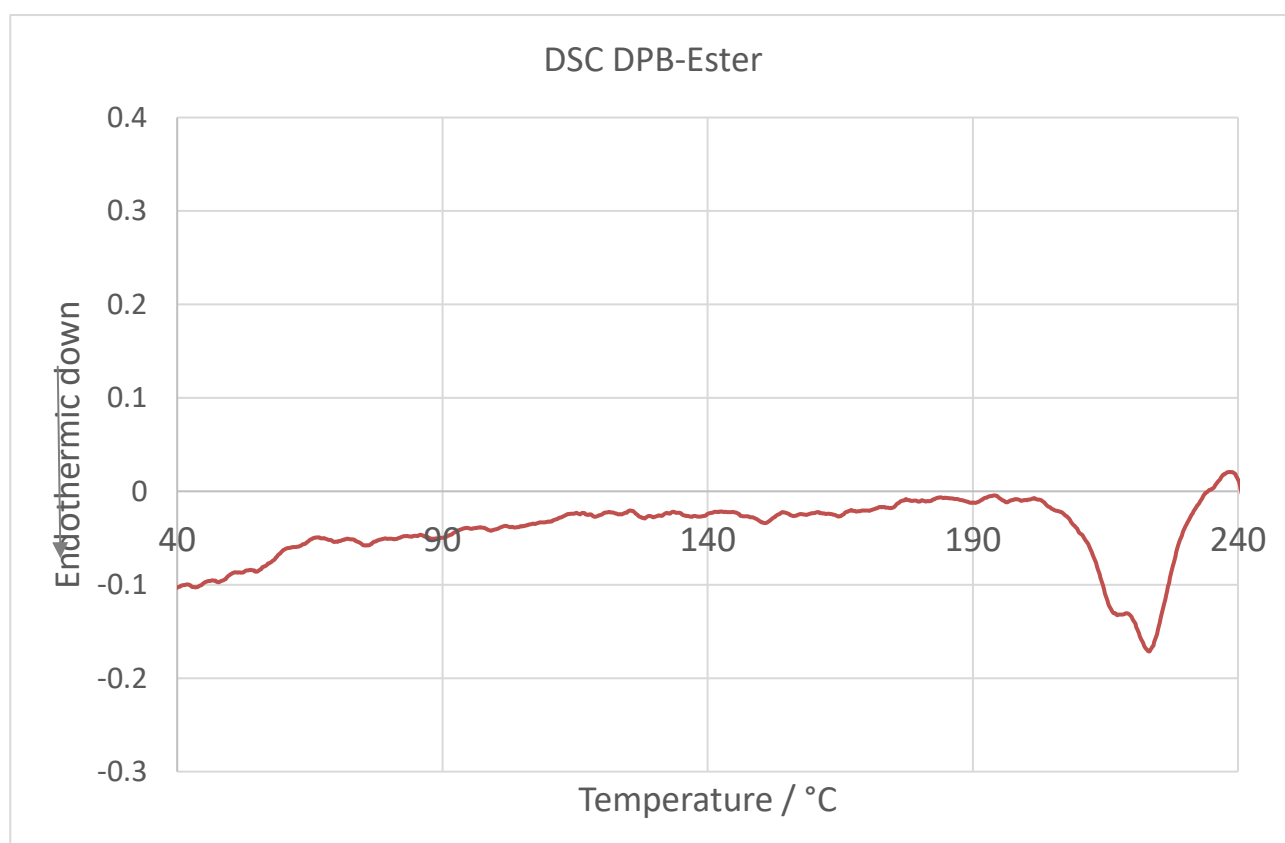

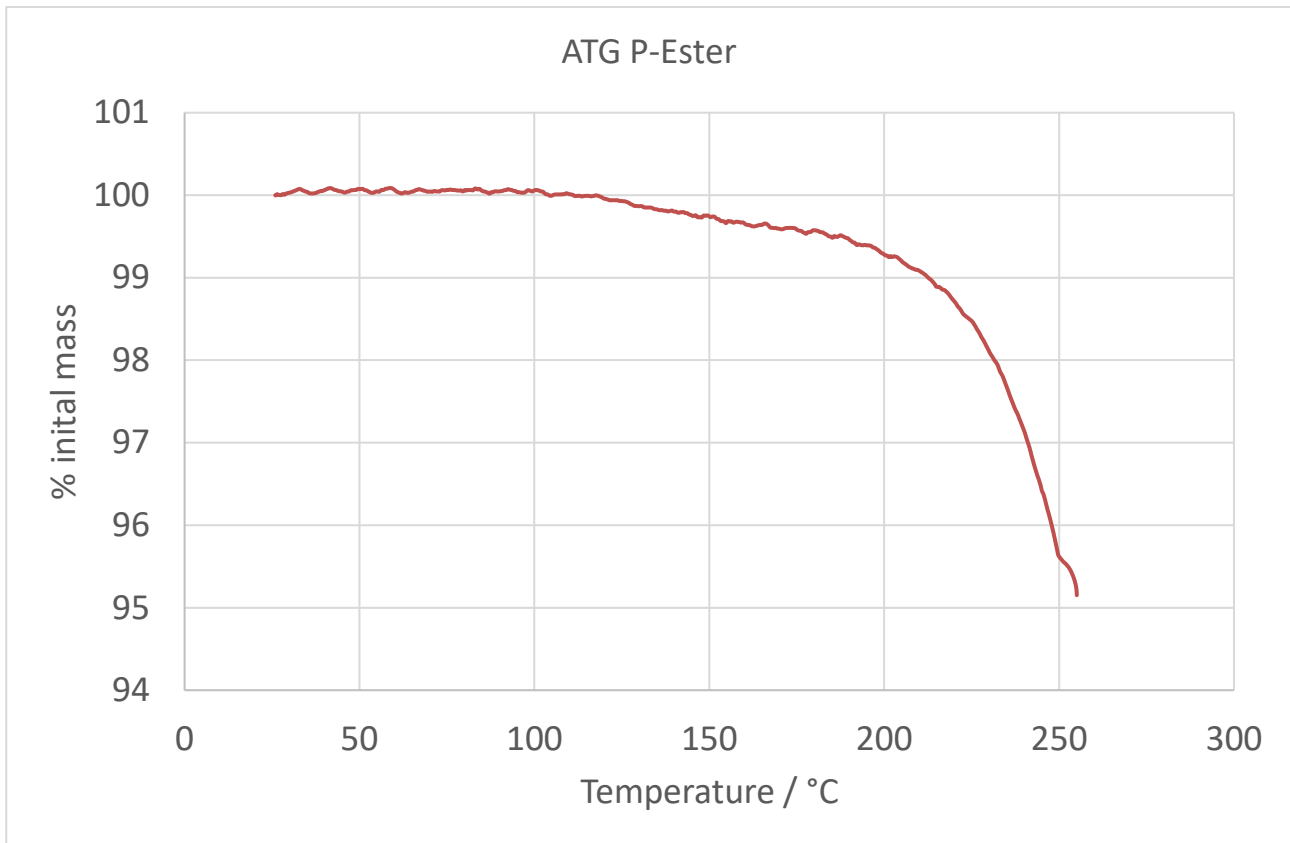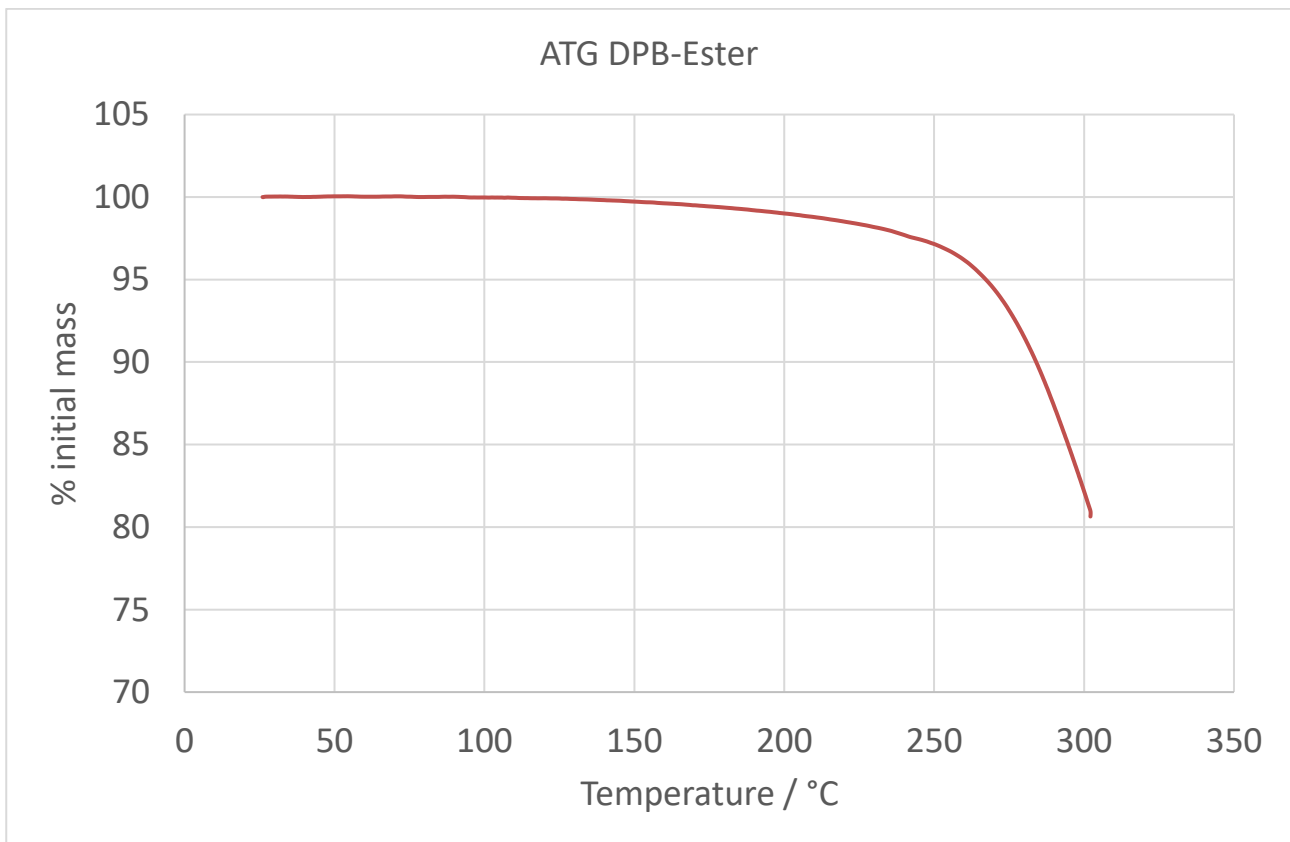

## Fluorescence decays

P-Ester in THF solution  $\langle\tau\rangle = 0.19$  ns at 430 nm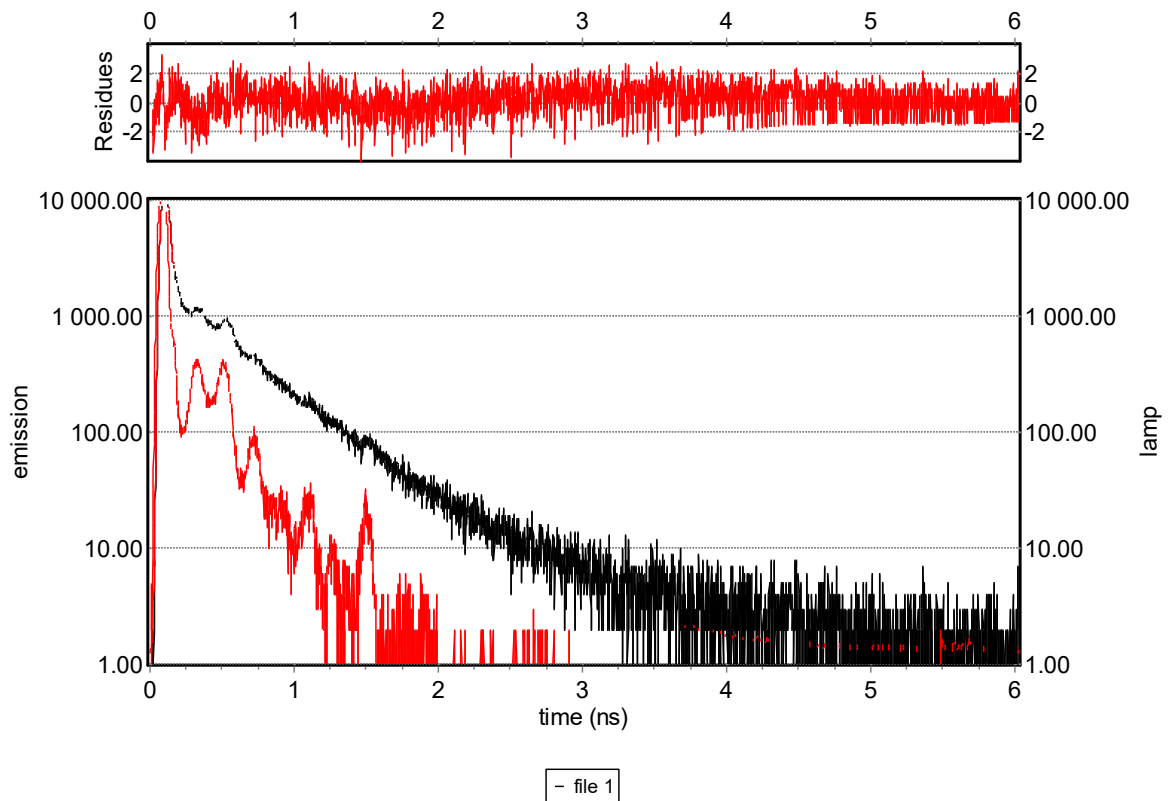DPB-Ester in THF solution  $\langle\tau\rangle = 0.92$  ns at 440 nm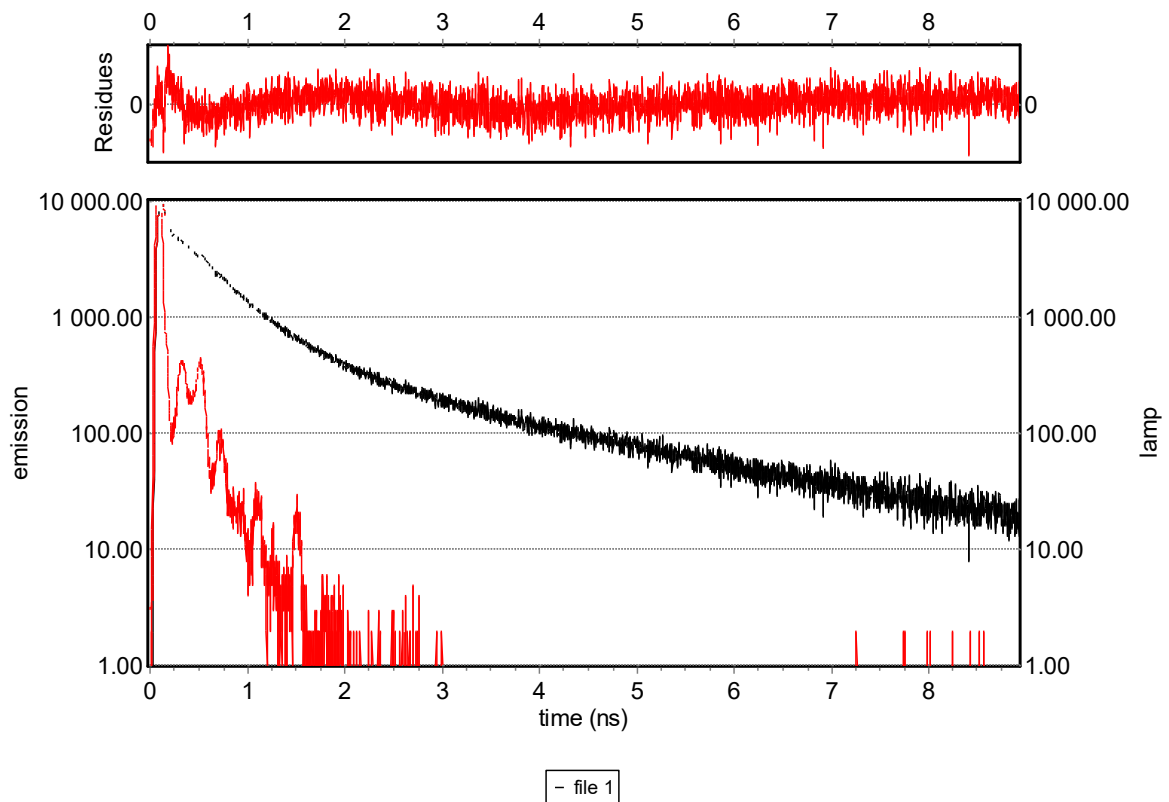

**P-Ester in the powder state  $\langle\tau\rangle = 2.41$  ns at 450 nm**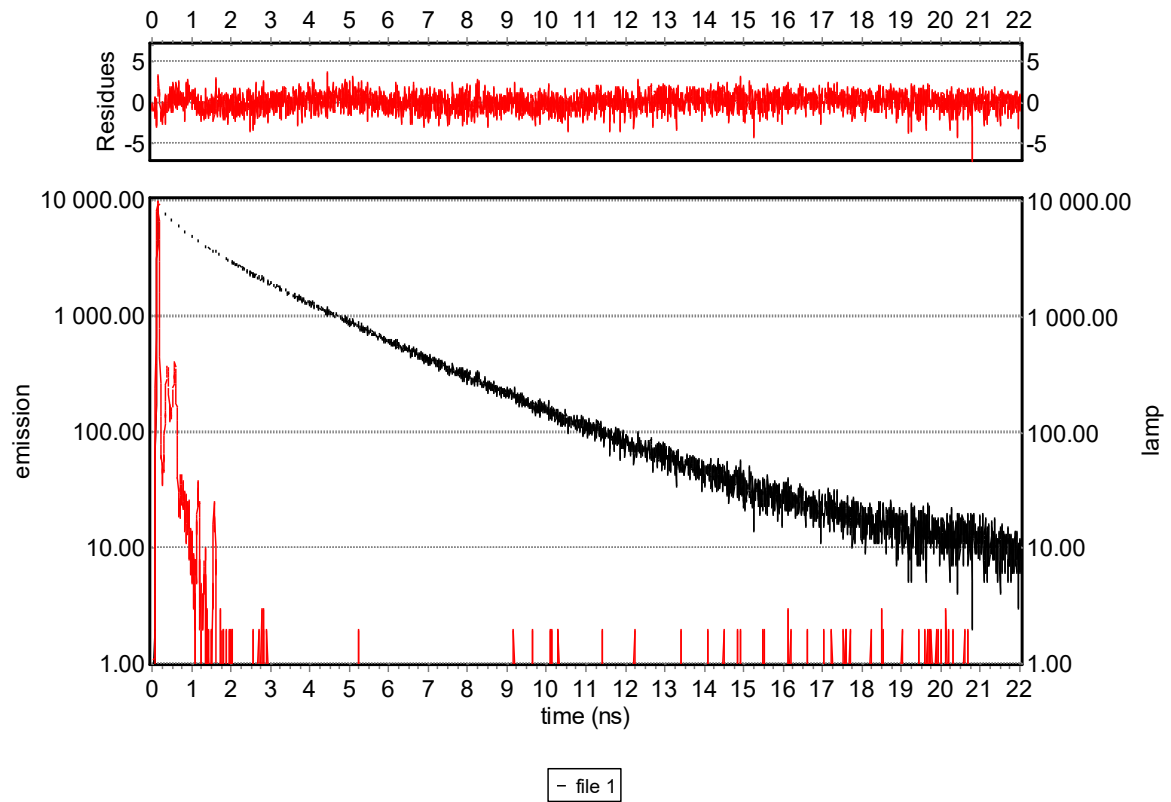**DPB-Ester in the powder state  $\langle\tau\rangle = 2.32$  ns at 550 nm**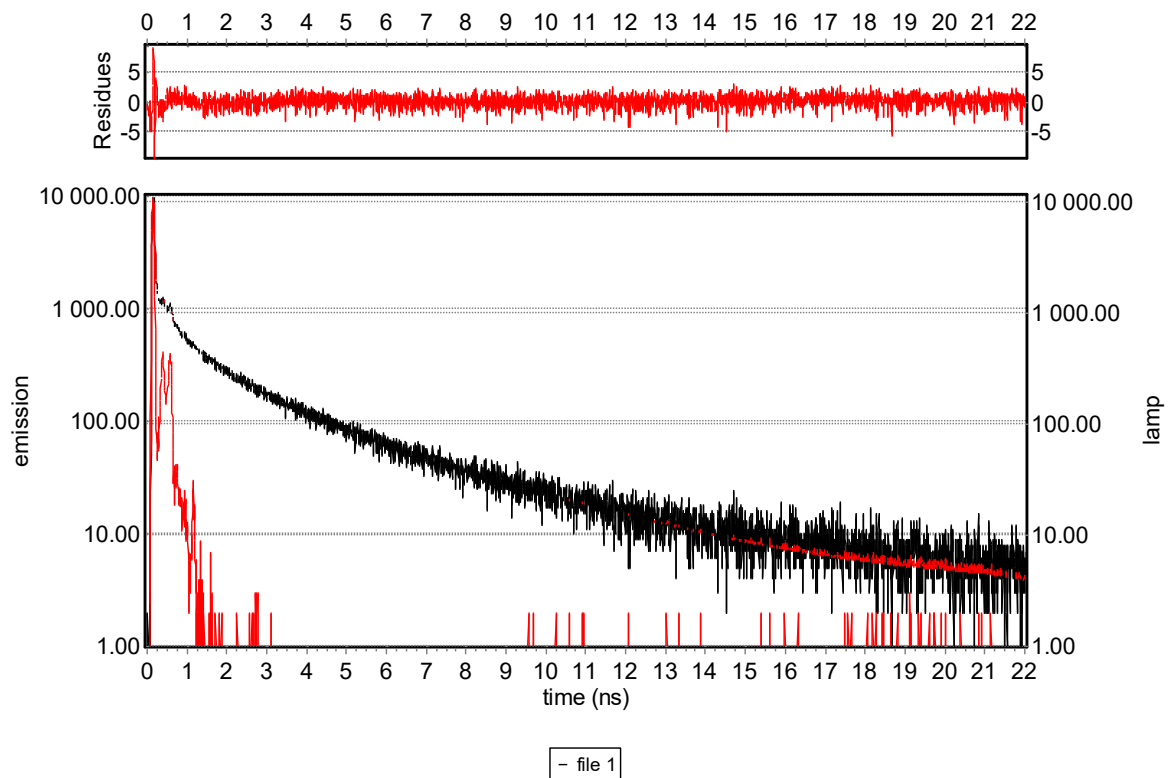



## Fluorescence excitation spectra

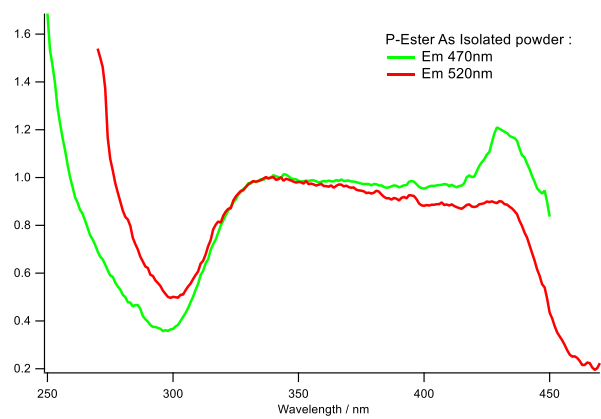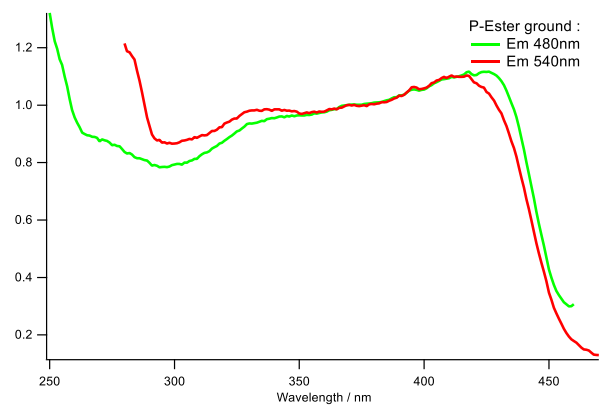

Supplement: c8pp00070k1.pdf [file c8pp00070k1.pdf]
